# Supplementary material for: Low Au-content CoAu electrodes for environmental applications
Source: Royal Society of Chemistry journal article supplement (doi:10.1039/d2ra04828k), 2022-01-01
Supplement: d2ra04828k1.pdf [file d2ra04828k1.pdf]

## Low Au-content CoAu electrodes for environmental applications

Kristina Radinović<sup>1</sup>, Jadranka Milikić<sup>1</sup>, Aldona Balčiūnaitė<sup>2</sup>, Zita Sukackienė<sup>2</sup>, Marko Bošković,<sup>3</sup> Loreta Tamašauskaitė-Tamašiūnaitė<sup>2</sup> and Biljana Šljukić<sup>1,4\*</sup>

<sup>1</sup>University of Belgrade, Faculty of Physical Chemistry, Studentski trg 12-16, 11158 Belgrade, Serbia

<sup>2</sup>Center for Physical Sciences and Technology, Saulėtekio ave. 3, LT-10257 Vilnius, Lithuania

<sup>3</sup>University of Belgrade, Institute of Chemistry, Technology, and Metallurgy, Department of Microelectronic Technologies, Njegoševa 12, 11000 Belgrade, Serbia

<sup>4</sup>Center of Physics and Engineering of Advanced Materials, Laboratory for Physics of Materials and Emerging Technologies, Chemical Engineering Department, Instituto Superior Técnico, Universidade de Lisboa, 1049-001 Lisbon, Portugal

\* Corresponding author: [biljka@ffh.bg.ac.rs](mailto:biljka@ffh.bg.ac.rs)

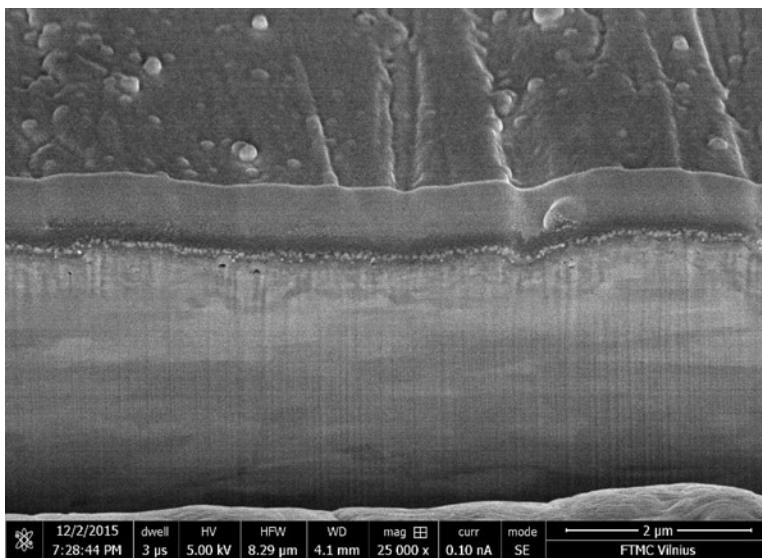

**Figure S1.** TEM image of the cross section of Co deposited onto Cu.

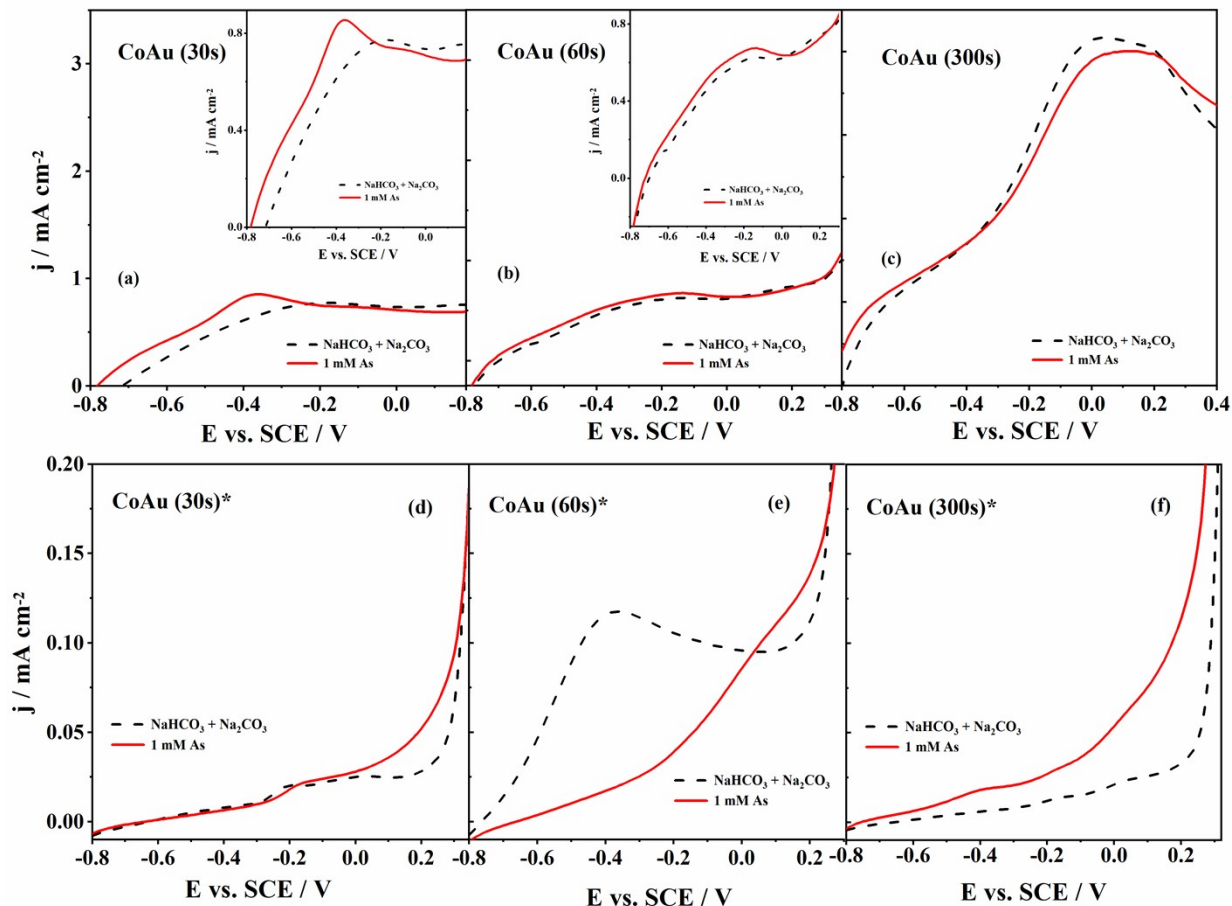

**Figure S2.** ASV of (a,b,c) CoAu electrodes prepared by immersion into 1 mM HAuCl<sub>4</sub> (pH 1.8) at 30° C for different periods (30 s, 60 s and 300 s) and (d,e,f) CoAu electrodes prepared by immersion into 1 g l<sup>-1</sup> KAu(CN)<sub>2</sub> + 0.4 M (NH<sub>4</sub>)<sub>2</sub>C<sub>6</sub>H<sub>6</sub>O<sub>7</sub> complex (pH = 5) for various periods (30 s, 60 s and 300 s). ASVs recorded in NaHCO<sub>3</sub> + Na<sub>2</sub>CO<sub>3</sub> buffer in the absence and in the presence of As (III) (1 mM) recorded at a scan rate of 50 mV s<sup>-1</sup> after holding the potential at -0.7 V for 60 s.
